# Supplementary material
Source: MDPI journal article supplement (https://www.mdpi.com/2073-445X/11/2/301)
Supplement: s1 [file s1]

Supplementary Materials

**Table S1.** Model evaluation statistics of model 1: habitat availability (100 m resolution) and model 2: habitat suitability (4.5 km resolution) with delta AICc values of  $\leq 2$ . The variables are referred to as FC, feature classes (L—linear, Q—quadratic, H—hinge); RM regularization multiplier;  $AUC_{DIFF}$ , the difference between training and testing AUC; validation AUC, the validation set to estimate prediction error for model selection;  $OR_{10}$ , 10% training omission rate; AICc, the Akaike information criterion corrected for small sample sizes; delta AICc, the difference between the lowest AICc and each AICc; and N.coef, the number of coefficients.

| Models                           | FC  | RM | Mean<br>$AUC_{DIFF}$ | Variance<br>$AUC_{DIFF}$ | Mean<br>Validation AUC | Variance<br>Validation AUC | Mean<br>$OR_{10}$ | Variance<br>$OR_{10}$ | AICc     | Delta<br>AICc | N.coef |
|----------------------------------|-----|----|----------------------|--------------------------|------------------------|----------------------------|-------------------|-----------------------|----------|---------------|--------|
| Model 1: habitat<br>availability | LQH | 1  | 0.017                | 0.008                    | 0.852                  | 0.013                      | 0.106             | 0.032                 | 12393.31 | 0             | 86     |
| Model 2: habitat<br>suitability  | LQH | 1  | 0.043                | 0.028                    | 0.760                  | 0.042                      | 0.129             | 0.077                 | 1226.97  | 0             | 12     |

### Habitat availability ecological niche model (1)

Marginal response curves (all but one variable kept at mean value)

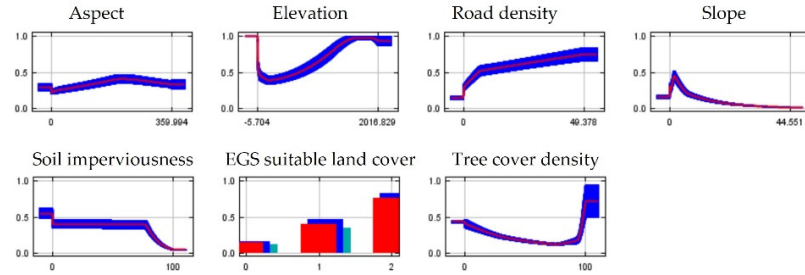

Univariate response curves (based on model with only corresponding variable)

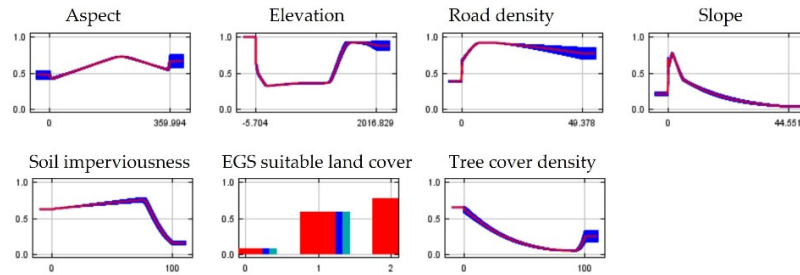

### Habitat suitability ecological niche model (2)

Marginal response curves (all but one variable kept at mean value)

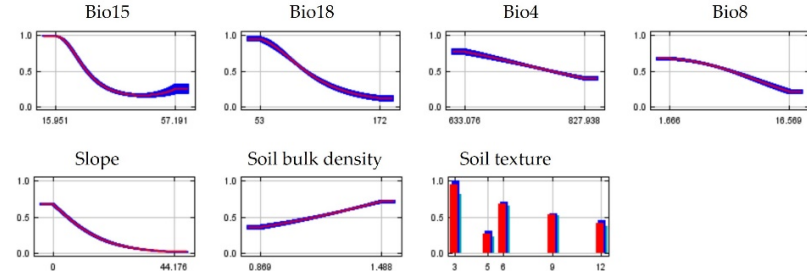

Univariate response curves (based on model with only corresponding variable)

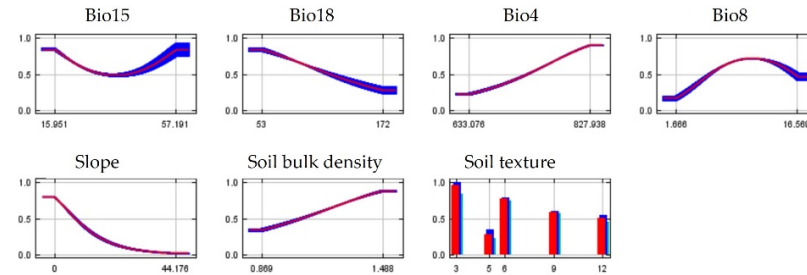

**Figure S1.** Marginal (above group of diagrams) and univariate (below group of diagrams) response curves of the variables that were used in the habitat availability ecological niche model 1 (left) and habitat suitability ecological niche model 2 (right). The numbers of categorical variables indicate suitable land cover for EGS: 0, the unsuitable habitats; 1, the suitable habitats; and 2, the highly suitable habitats, according to our classification, and for soil texture: 3, silt clay-loam; 5, sandy clay-loam; 6, clay-loam; 9, loam; and 12, sandy loam, according to the USDA classification (for more details, please see Section 2.3 of Materials and Methods).

**Table S2.** Area characteristics (property, Corine land cover, and protection status) of the present and absent colonies of *Spermophilus citellus* in three sub-populations in Greece that were used in the analysis.

| Sub-Population    | Property Status | Land Use                       | Protection                            | Number of Colonies |        |
|-------------------|-----------------|--------------------------------|---------------------------------------|--------------------|--------|
|                   |                 | Corine Land Cover<br>(Level 3) | Natura 2000                           | Present            | Absent |
| Western Macedonia | Public          | 112                            | –                                     | 1                  | 2      |
|                   |                 | 142                            | –                                     | 1                  | 0      |
|                   |                 | 211                            | –                                     | 0                  | 3      |
|                   |                 | 212                            | –                                     | 0                  | 1      |
|                   |                 | 231                            | –                                     | 1                  | 0      |
|                   |                 | 242                            | GR1340004                             | 0                  | 1      |
|                   |                 |                                | –                                     | 0                  | 1      |
|                   |                 | 321                            | GR1210001                             | 1                  | 0      |
|                   | Private         |                                | –                                     | 2                  | 0      |
|                   |                 | 112                            | –                                     | 1                  | 0      |
|                   |                 | 211                            | –                                     | 1                  | 2      |
|                   |                 | 212                            | –                                     | 0                  | 3      |
| Central Macedonia | Public          | 112                            | –                                     | 1                  | 2      |
|                   |                 | 113                            | –                                     | 1                  | 0      |
|                   |                 | 121                            | GR1220002                             | 0                  | 1      |
|                   |                 | 124                            | GR1220012                             | 0                  | 1      |
|                   |                 |                                | –                                     | 1                  | 1      |
|                   |                 | 142                            | –                                     | 1                  | 0      |
|                   |                 | 211                            | GR1220001,<br>GR1220002,<br>GR1220009 | 4                  | 3      |
|                   |                 |                                | –                                     | 0                  | 2      |
|                   |                 | 212                            | GR1220001,<br>GR1220009               | 1                  | 2      |
|                   |                 |                                | –                                     | 1                  | 0      |
|                   |                 | 213                            | GR1220002                             | 0                  | 1      |
|                   |                 |                                | –                                     | 0                  | 3      |
|                   |                 | 231                            | GR1220002                             | 2                  | 0      |
|                   |                 |                                | –                                     | 0                  | 2      |

|        |         |     |                         |    |    |
|--------|---------|-----|-------------------------|----|----|
|        |         | 242 | -                       | 1  | 0  |
|        |         | 331 | GR1220001               | 0  | 1  |
|        |         | 411 | GR1220001,<br>GR1220002 | 0  | 2  |
|        |         | 421 | GR1220002,<br>GR1220010 | 1  | 2  |
|        |         |     | -                       | 0  | 1  |
|        |         | 422 | GR1220005               | 0  | 1  |
|        |         | 112 | -                       | 0  | 1  |
|        |         | 121 | -                       | 3  | 1  |
|        |         | 211 | GR1220001               | 3  | 0  |
|        | Private |     | -                       | 3  | 5  |
|        |         | 212 | -                       | 0  | 6  |
|        |         | 213 | -                       | 0  | 1  |
|        |         | 231 | -                       | 0  | 1  |
|        |         | 242 | -                       | 2  | 3  |
| Thrace |         | 121 | -                       | 1  | 0  |
|        |         | 124 | -                       | 1  | 0  |
|        |         | 211 | -                       | 0  | 1  |
|        | Public  | 212 | -                       | 0  | 1  |
|        |         | 231 | -                       | 0  | 1  |
|        |         | 412 | GR1110007               | 0  | 1  |
|        |         | 421 | GR1110007               | 0  | 1  |
|        |         | 211 | -                       | 2  | 0  |
|        | Private |     | GR1110005,<br>GR1110007 | 0  | 2  |
|        |         | 212 |                         |    |    |
|        |         |     | -                       | 0  | 7  |
| TOTAL  |         |     | 10                      | 37 | 70 |
